# Supplementary material for: Circulation of chikungunya virus East/Central/South African lineage in Rio de Janeiro, Brazil
Source: PubMed Central journal article supplement (PMC6559644; doi:10.1371/journal.pone.0217871), 2019-06-11
Supplement: pone.0217871.s004.pdf [file pone.0217871.s004.pdf]

**S2 Table. Nucleotide substitutions observed in the genome of the RJ137 isolate.**

| <b>Genome nucleotide position</b> | <b>Amino acid</b> |
|-----------------------------------|-------------------|
| C1069T                            | Y                 |
| C1912T                            | F                 |
| G2735C                            | P                 |
| G3250A                            | T                 |
| G3415A                            | M                 |
| G5996A                            | D                 |
| C6670T                            | C                 |
| A7107C                            | S                 |
| G9074A                            | H                 |
| C10625A                           | K                 |
