# Supplementary material for: Circulation of chikungunya virus East/Central/South African lineage in Rio de Janeiro, Brazil
Source: PLoS One. 2019 Jun 11;14(6):e0217871. doi: 10.1371/journal.pone.0217871 (PMC6559644; doi:10.1371/journal.pone.0217871)
Supplement: S1 Table — (XLSX) [file pone.0217871.s003.xlsx]

## Sheet: Sheet1
Accession number	Country	Year
AB455494	Japan	2006
AM258991	Seychelles	2005
AM258992	Reunion	2005
AM258993	Reunion	2005
AM258994	Reunion	2005
AM258995	Reunion	2005
AY726732	Senegal	1983
DQ443544	Reunion	2006
EF012359	Mauritius	2006
EF027134	India	2006
EF027135	India	2006
EF027138	India	2006
EF027140	India	1963
EF027141	India	1973
EU244823	Italy	2007
EU372006	India	2007
EU564334	Mauritius	2006
EU564335	India	2006
EU703759	Malaysia	2006
EU703760	Malaysia	2006
EU703761	Malaysia	2006
EU703762	Malaysia	2006
FJ000064	India	2006
FJ000065	India	2006
FJ000067	India	2006
FJ000068	India	2006
FJ000069	India	2007
FJ445426	Sri-Lanka	2008
FJ445427	Sri-Lanka	2007
FJ445428	Sri-Lanka	2007
FJ445430	Singapore	2008
FJ445431	Singapore	2008
FJ445432	Singapore	2008
FJ445443	Singapore	2008
FJ445445	Singapore	2008
FJ445510	Singapore	2008
FJ513629	Sri-Lanka	2008
FJ513632	Sri-Lanka	2008
FJ513637	Sri-Lanka	2008
FJ513673	Sri-Lanka	2008
FJ513675	Sri-Lanka	2008
FJ807896	Singapore	2006
FJ807897	Indonesia	2007
FJ807898	Bangladesh	2008
FJ807899	Malaysia	2008
FN295483	Malaysia	2006
FN295484	Malaysia	2006
FN295485	Malaysia	2008
FN295487	Malaysia	2008
FR717336	Reunion	2005
GQ428210	India	2006
GQ428211	India	2006
GQ428212	India	2007
GQ428213	India	2007
GQ428214	India	2008
GQ428215	India	2008
GU189061	Sri-Lanka	2006
GU199350	China	2008
GU199351	China	2008
GU199352	China	2008
GU199353	China	2008
GU301779	Thailand	2009
GU301780	Thailand	2008
GU301781	Thailand	2009
GU908223	Thailand	2009
HE806461	New-Caledonia	2011
HM045784	Central-African-Republic	1984
HM045785	Senegal	1966
HM045786	Nigeria	1964
HM045787	Thailand	1995
HM045788	India	1973
HM045789	Thailand	1988
HM045790	Philippines	1985
HM045791	Indonesia	1983
HM045792	South-Africa	1956
HM045795	South-Africa	1976
HM045796	Thailand	1995
HM045797	Indonesia	1985
HM045798	Senegal	1966
HM045800	Philippines	1985
HM045802	Thailand	1995
HM045803	India	1963
HM045805	South-Africa	1976
HM045807	Nigeria	1965
HM045808	Thailand	1978
HM045809	DR-Congo	1960
HM045810	Thailand	1958
HM045811	Tanzania	1953
HM045812	Uganda	1982
HM045813	India	1963
HM045814	Thailand	1975
HM045815	Senegal	1979
HM045816	Senegal	1966
HM045817	Senegal	2005
HM045818	Ivory-Coast	1981
HM045819	Senegal	1993
HM045820	Ivory-Coast	1993
HM045821	Senegal	1963
HM045822	Central-African-Republic	1978
HQ456251	Moroni-Comoros	2005
HQ456252	Grande-Comore-Comoros	2005
HQ456253	Moroni-Comoros	2005
HQ456254	Mombasa-Kenya	2004
HQ456255	Lamu-Island-Kenya	2004
JF274082	India	2006
JQ861253	Cambodia	2011
JQ861254	Cambodia	2011
JQ861255	Cambodia	2011
JQ861256	Cambodia	2011
JQ861257	Cambodia	2011
JQ861258	Cambodia	2011
JQ861259	Cambodia	2011
JQ861260	Cambodia	2011
KC614648	Yemen	2011
KC862329	Indonesia	2010
KF318729	China	2012
KF590564	Myanmar	2010
KF590565	Myanmar	2010
KF590566	Myanmar	2010
KF590567	Myanmar	2010
KJ451622	Micronesia	2013
KJ451623	Micronesia	2013
KJ451624	British-Virgin-Islands	2014
KJ579184	Thailand	2013
KJ579185	Thailand	2013
KJ579186	Thailand	2013
KJ579187	Thailand	2013
KJ679577	India	2011
KJ679578	India	2011
KJ796845	India	2009
KJ796851	Thailand	2008
KJ796852	Thailand	2009
KJ941050	USA-India	2006
KP003807	France	2006
KP003808	Madagascar	2006
KP003809	Mayotte	2006
KP003810	Italy	2007
KP003811	Italy	2007
KP003812	Gabon	2007
KP164568	Brazil	2014
KP164569	Brazil	2014
KP164570	Brazil	2014
KP164571	Brazil	2014
KT308163	Philippines	2012
KT324224	Malaysia	2008
KT324227	Malaysia	2009
KT336779	India	2012
KT336780	India	2012
KT336781	India	2013
KT336782	India	2013
KU355832	Brazil	2015
KU940225	Brazil	2015
KU940226	Brazil	2015
KX228391	Brazil	2016
KX262986	Senegal	1983
KX262991	Saint-Martin	2003
KX262992	Guadeloupe	2014
KX262995	Senegal	1983
KX262996	Cameroon	2006
KX702401	Haiti	2014
KX702402	Haiti	2014
KY055011	Brazil	2016
KY124328	Brazil	2016
KY124329	Brazil	2016
KY415978	Haiti	2014
KY415979	Haiti	2014
KY415980	Haiti	2014
KY415981	Haiti	2014
KY415982	Haiti	2014
KY415983	Haiti	2014
KY415984	Haiti	2014
KY415985	Haiti	2014
KY575567	USA	2006
KY575568	USA	2006
KY575570	USA	2008
KY575571	USA	2006
KY575574	USA	1995
KY704939	Brazil	2016
KY704942	Brazil	2016
KY704952	Brazil	2016
KY704954	Brazil	2016
KY704955	Brazil	2016
KY751908	Australia	2016
MF740874	Pakistan	2017
LC259094	Angola	2016
MF773560	Caribbean	2014
MF773563	Philippines	2014
MF773566	Bangladesh	2017
MF773567	Borneo	2011
MF773568	Malaysia	2008
MF773569	Papua-New-Guinea	2013
MG000875	Haiti	2016
MG000876	Haiti	2016
MG049915	Italy	2017
MG649970	Brazil	2016
MG649971	Brazil	2016
MG649972	Brazil	2016
MG649973	Brazil	2016
MG649974	Brazil	2016
MG649975	Brazil	2016
MG649976	Brazil	2016
MG649977	Brazil	2016
MG649978	Brazil	2017
MG649979	Brazil	2017
MG649980	Brazil	2016
MG649981	Brazil	2016
MG649982	Brazil	2017
MG649983	Brazil	2016
MG649984	Brazil	2015
MG649985	Brazil	2015
MG664850	China	2010
MK121891	Brazil	2015
MK121892	Brazil	2015
MK121893	Brazil	2015
MK121894	Brazil	2016
MK121895	Brazil	2017
MK121896	Brazil	2017
MK121897	Brazil	2017
MK121898	Brazil	2017
MK121899	Brazil	2017
MK121900	Brazil	2017
MK121901	Brazil	2017
MK121902	Brazil	2017
MK121903	Brazil	2017
MK121904	Brazil	2017
MK121905	Brazil	2017
MK121906	Brazil	2017
MK121907	Brazil	2017
MK121908	Brazil	2017
